# Supplementary material
Source: Elsevier journal article supplement (https://www.sciencedirect.com/science/article/pii/S217351071630057X)

**Figura S1 *online*** Paciente con encefalopatía hepática crónica conocida. Imagen sagital de RM potenciada en T1 que muestra hiperintensidad de la señal en el globo pálido, el hipotálamo y el mesencéfalo por depósito de manganeso (puntas de flecha).


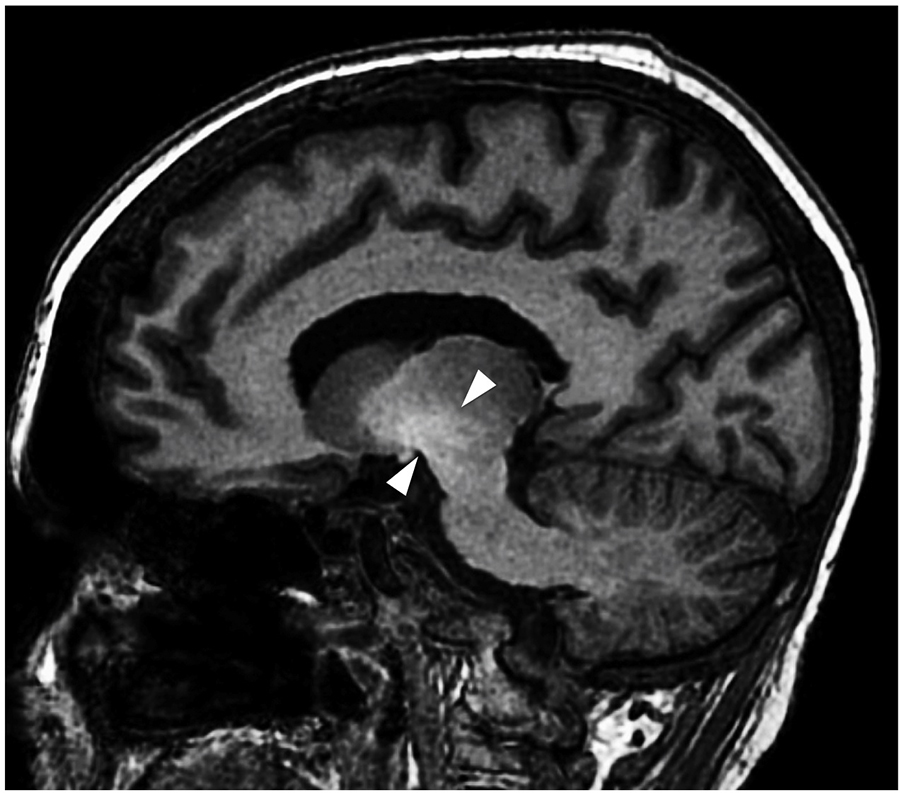


**Figura S2 *online*** Hombre de mediana edad consumidor crónico de 3,4-metilendioximetanfetamina (MDMA). En la imagen transversal de TC se identifica una sutil área de hipodensidad en el globo pálido derecho por isquemia crónica.


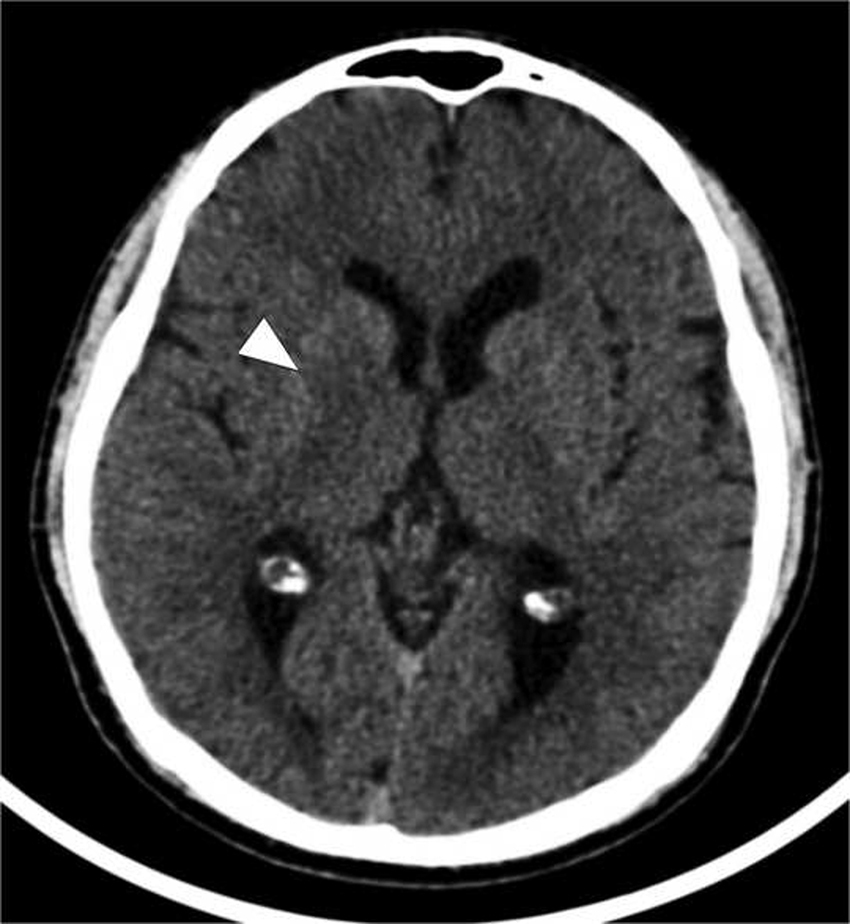

Supplement: mmc3 [file S217351071630057X:mmc3.docx]
